# Supplementary material
Source: publisher figshare collection journal article supplement (https://frontiersin.figshare.com/ndownloader/files/12854843)
Supplement: Supplementary file [file 12854843]

## **Supplementary Material**

### **Actigraphic daytime and nighttime variables**

Actigraphic recordings were divided into nighttime and daytime periods based on individual bedtime and wake-up time (indicated through event-marker points and reported in the sleep diary) and mean actigraphic parameters were computed over seven days.

The following nighttime actigraphic parameters were considered: bedtime, wake time, midpoint (clock time, in hours and minutes, that split in half the TIB), time in bed (TIB), estimated total sleep time (*eTST*), estimated wake after sleep onset (*eWASO*), estimated sleep efficiency, estimated nocturnal awakenings frequency, estimated prolonged (lasting more than 5 min) nocturnal awakenings frequency, estimated longest sleep (longest continuous episode scored as sleep) and sleep motor activity (SMA – sum of activity counts in 1-min epochs during TIB divided by TIB duration in minutes). The following daytime actigraphic parameters were considered: daytime motor activity (DMA – sum of activity counts in 1-min epochs for the time period between wake time and bedtime divided by its duration in minutes), daytime estimated total sleep time (*eDTST* – sum of all minutes scored as sleep between wake time and bedtime), estimated nap frequency (with a nap defined as an interval of at least 10 min up to 3 h scored as sleep, preceded and followed by a period of at least 30 continuous min scored as wake), mean duration of estimated nap (*eNapD*) and 24 hr estimated total sleep time (*e24hTST* – sum, in minutes, of all epochs scored as sleep in both nighttime and daytime periods).
